# Supplementary material for: Direct Implementation of Intestinal Permeability Test in NMR Metabolomics for Simultaneous Biomarker Discovery—A Feasibility Study in a Preterm Piglet Model
Source: PubMed Central journal article supplement (PMC7022985; doi:10.3390/metabo10010022), 2020-01-01
Supplement: metabolites-10-00022-s001.pdf [file metabolites-10-00022-s001.pdf]

Supplementary materials:

(a)

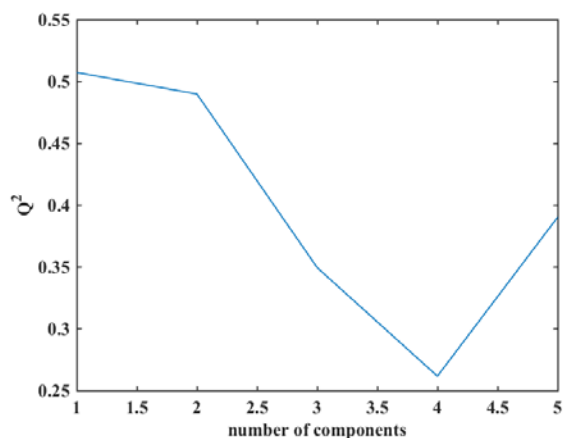

(b)

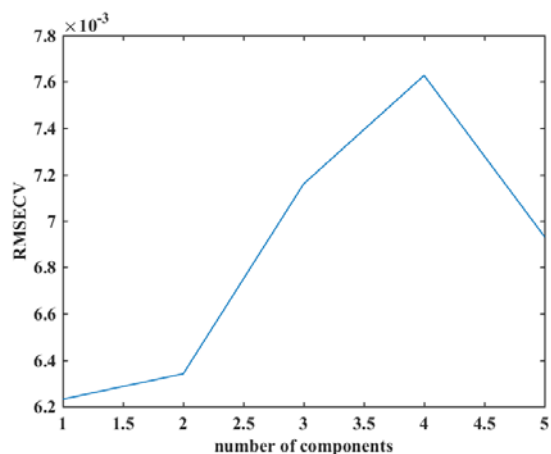

(c)

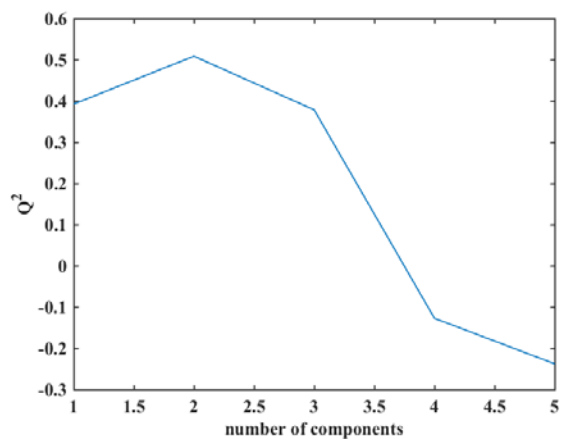

(d)

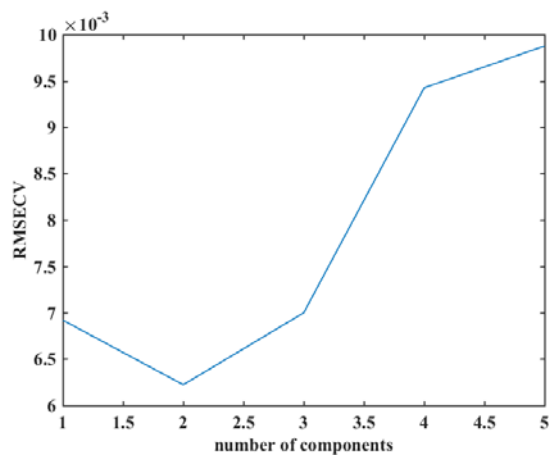

Figure S1. Leave-one-out cross validation for PLS model (a) and (b) plasma NMR data, (c) and (d) urine NMR data. (a)  $Q^2$  value for PLS on plasma data, and (b) RMSECV for PLS model on plasma data. (c)  $Q^2$  value for PLS on urine data, and (d) RMSECV for PLS model on urine data.
